# Supplementary material for: The critical role of oxygen-evolution kinetics in the electrochemical stability of oxide superionic conductors
Source: Royal Society of Chemistry journal article supplement (doi:10.1039/c9ta04841c), 2019-01-01
Supplement: c9ta04841c1.pdf [file c9ta04841c1.pdf]

## **Supporting Information**

# **The Critical Role of Oxygen-Evolution Kinetics in Electrochemical Stability of Oxide Superionic Conductors**

Tiantian Wang<sup>a,b</sup>, Wujie Qiu<sup>a,b</sup>, Qi Feng<sup>c</sup>, Kui Huang<sup>c</sup>, Xiaolin Zhao<sup>a,b</sup>, Qisheng Bao<sup>a,b</sup>,  
Youwei Wang<sup>a,b</sup>, Guangnan Zhu<sup>c,\*</sup>, Jianjun Liu<sup>a,b,\*</sup>

*a. State Key Laboratory of High Performance Ceramics and Superfine Microstructure, Shanghai  
institute of Ceramics, Chinese Academy of Sciences, 1295 Dingxi Road, Shanghai 200050, China.*

*b. Center of Materials Science and Optoelectronics Engineering, University of Chinese Academy  
of Sciences, Beijing 100049, China*

*c. SAIC Motor Corporation limited, 201 Anyan Road, Jiading District, Shanghai 201804, China.*

*E-mail: [jliu@mail.sic.ac.cn](mailto:jliu@mail.sic.ac.cn) ; [zhuguannan@saicmotor.com](mailto:zhuguannan@saicmotor.com)*

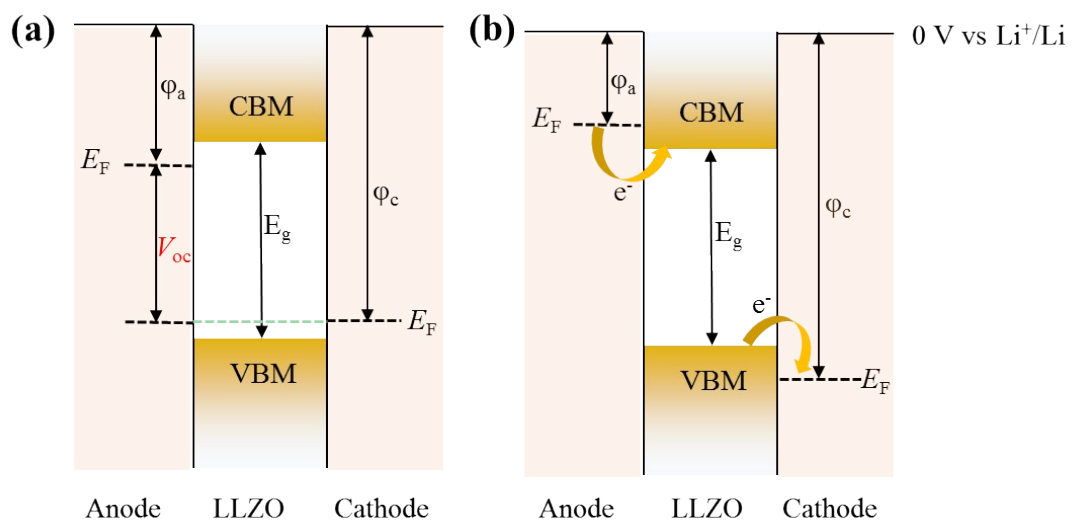

**Figure S1. (a) Electrodes electrochemical potentials versus the electrochemical window and bandgap of the LLZO electrolyte; (b) The process of electron-transfer between electrodes and LLZO electrolyte.**

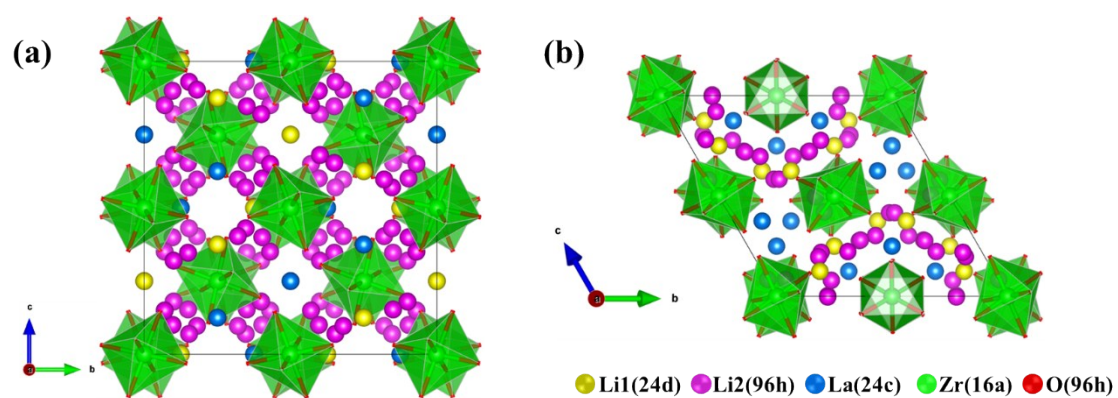

**Figure S2 The unit cell (a) and primitive cell (b) of LLZO with full Li ions occupation.**

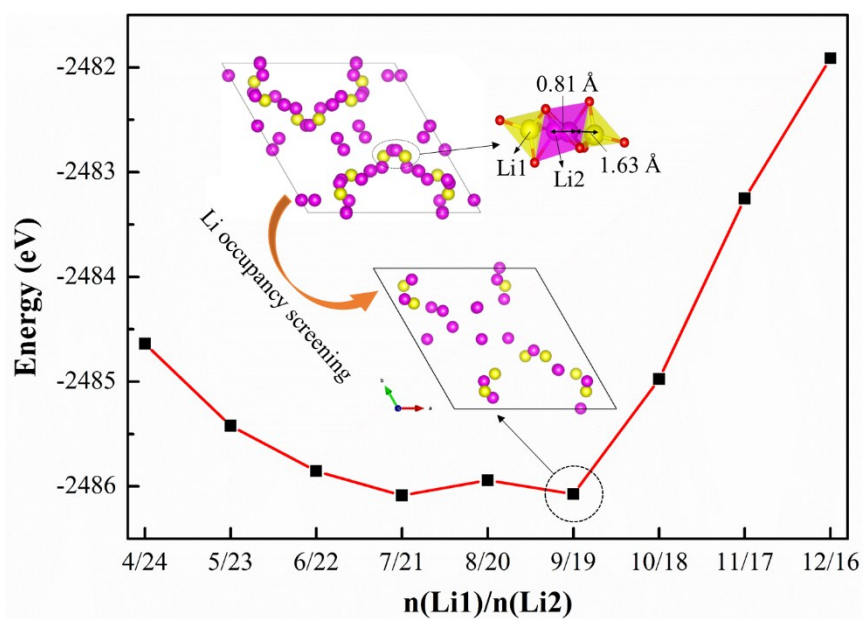

**Figure S3** The energy of each Li1/Li2 ratio in the primitive cell obtained by supercell program.

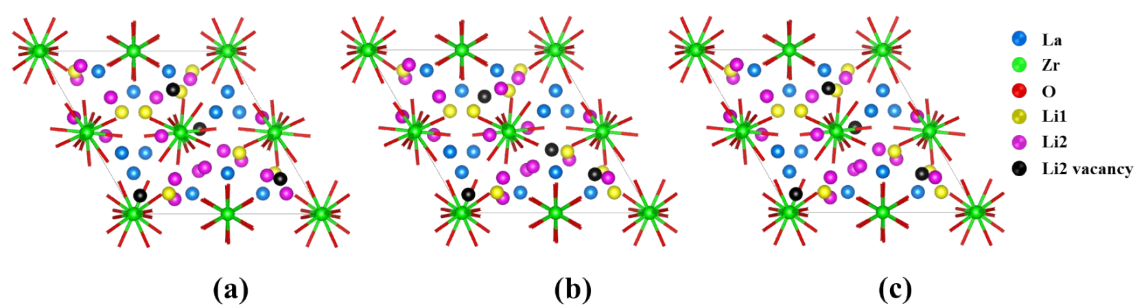

**Figure S4. The first three structures with the lowest free energy of LLZO primitive cells screened by supercell.**

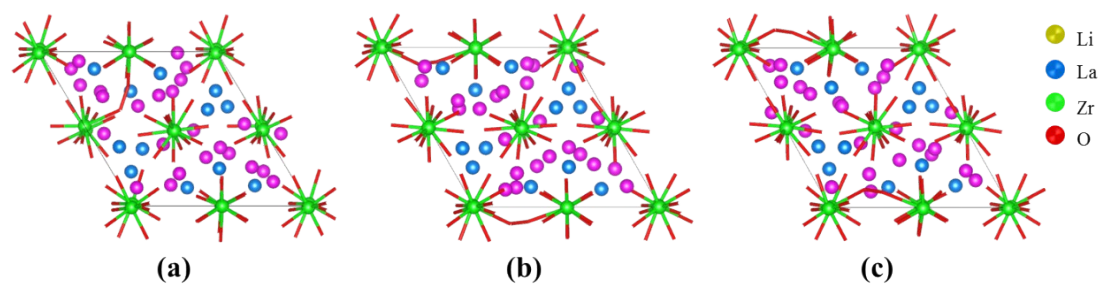

**Figure S5.** The most three stable LLZO with 4 lithium ions removed structures of all the generations produced by META. The O-O bond is formed by O1 and O2. (a) The first stable structure, (b) the second stable structure, (c) the third stable structure.

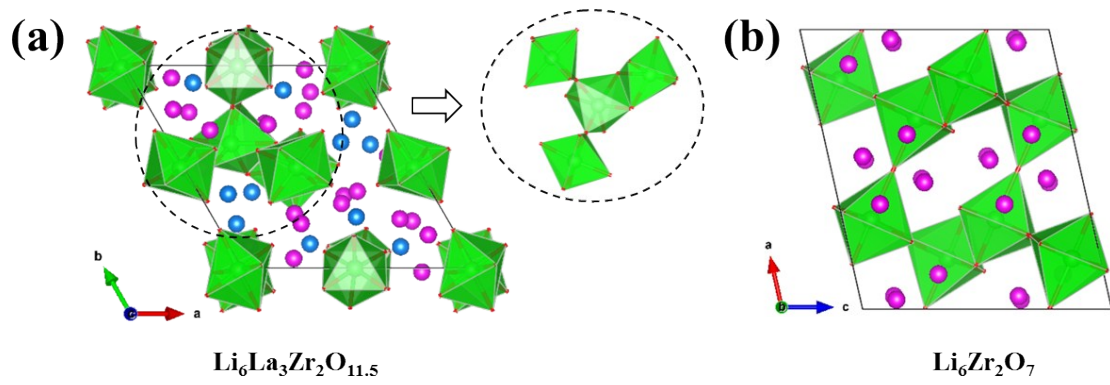

**Figure S6. (a)**The most stable LLZO with 4 Li ions, O1 and O2 removed structure produced by META. The local structure change is showed in the dashed black circle. **(b)**The structure of one of the decomposed phases  $\text{Li}_6\text{Zr}_2\text{O}_7$ .

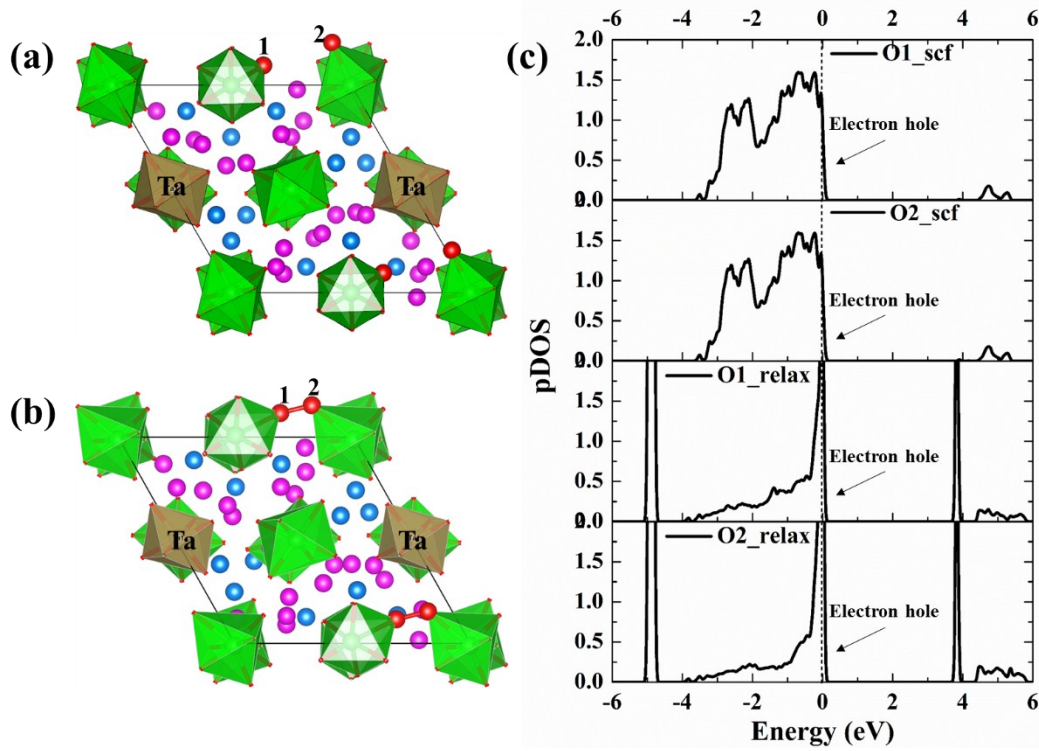

**Figure S7. (a)The crystal structure of LLZO\_Ta with four Li removed but the crystal lattice isn't relaxed. (b) The crystal structure of LLZO\_Ta with four Li removed and the crystal lattice is relaxed by Meta. (c) The local electronic structure of O1 and O2 before (scf) and after (relax) Meta\_dynamics.**

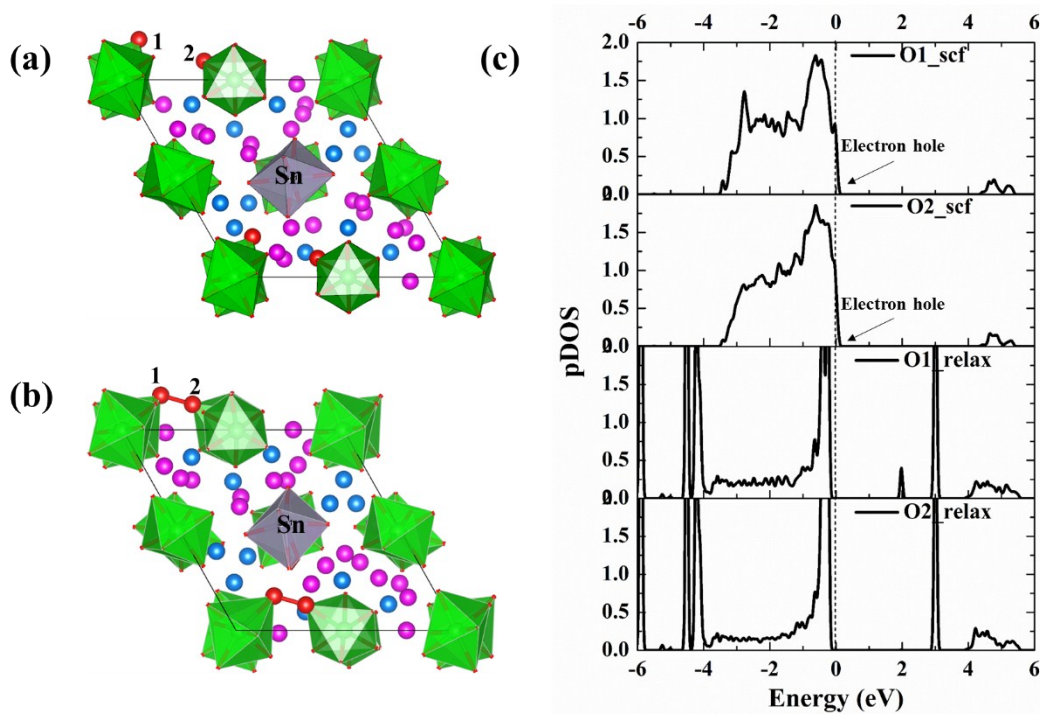

**Figure S8. (a)**The crystal structure of LLZO\_Sn with four Li removed but the crystal lattice isn't relaxed. **(b)** The crystal structure of LLZO\_Sn with four Li removed and the crystal lattice is relaxed by Meta. **(c)** The local electronic structure of O1 and O2 before (scf) and after (relax) Meta\_dynamics.

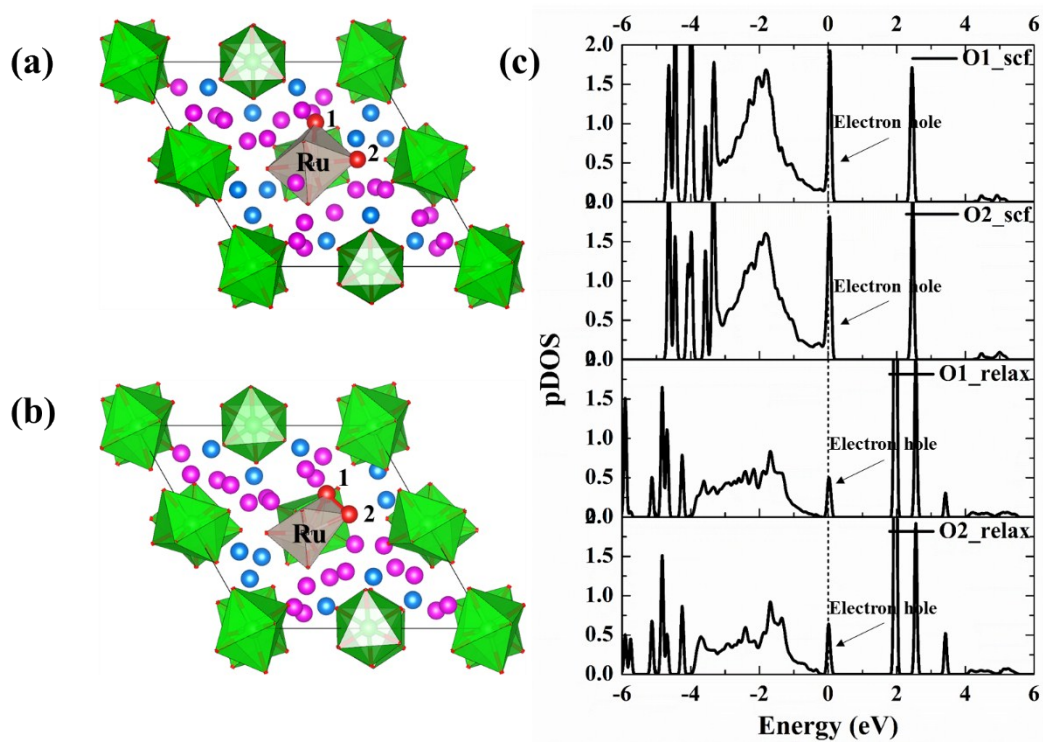

**Figure S9. (a)The crystal structure of LLZO\_Ru with four Li removed but the crystal lattice isn't relaxed. (b) The crystal structure of LLZO\_Ru with four Li removed and the crystal lattice is relaxed by Meta. (c) The local electronic structure of O1 and O2 before (scf) and after (relax) Meta\_dynamics.**

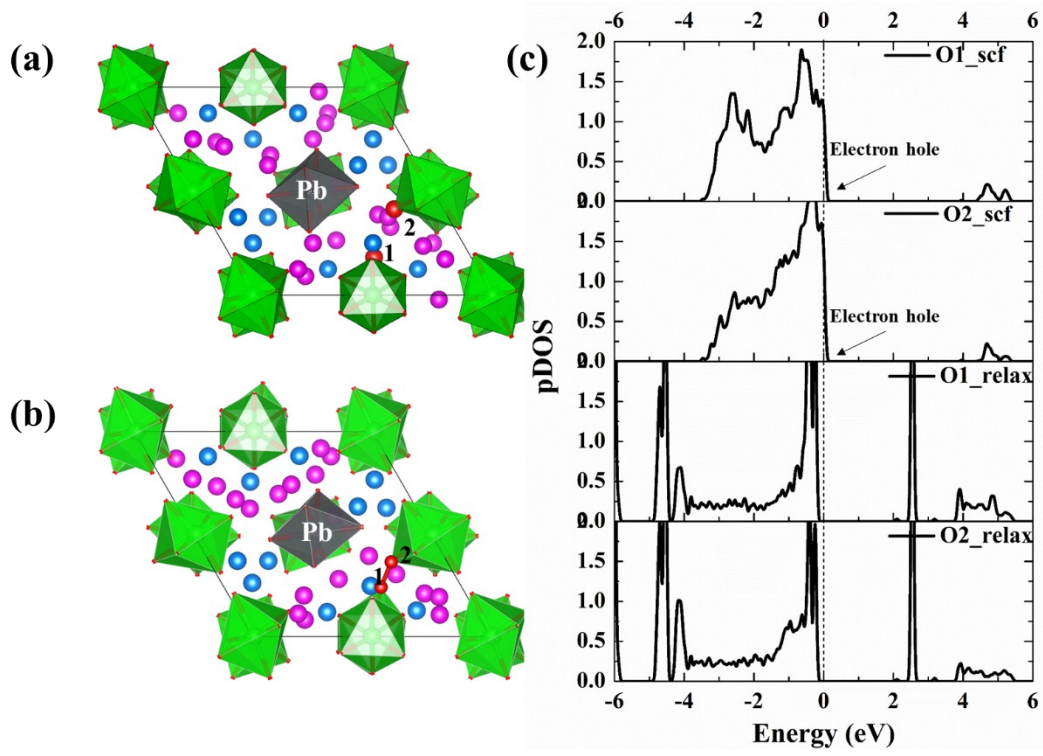

**Figure S10.** (a) The crystal structure of LLZO\_Pb with four Li removed but the crystal lattice isn't relaxed. (b) The crystal structure of LLZO\_Pb with four Li removed and the crystal lattice is relaxed by Meta. (c) The local electronic structure of O1 and O2 before (scf) and after (relax) Meta\_dynamics.

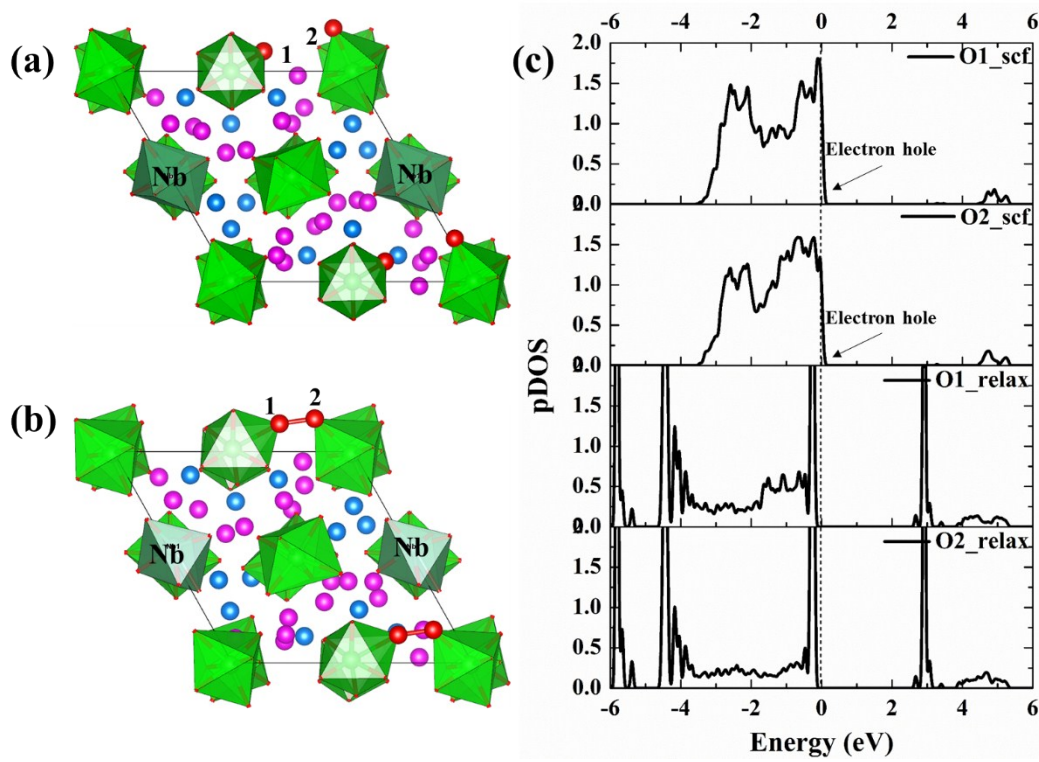

**Figure S11. (a)**The crystal structure of LLZO\_Nb with four Li removed but the crystal lattice isn't relaxed. **(b)** The crystal structure of LLZO\_Nb with four Li removed and the crystal lattice is relaxed by Meta. **(c)** The local electronic structure of O1 and O2 before (scf) and after (relax) Meta\_dynamics.

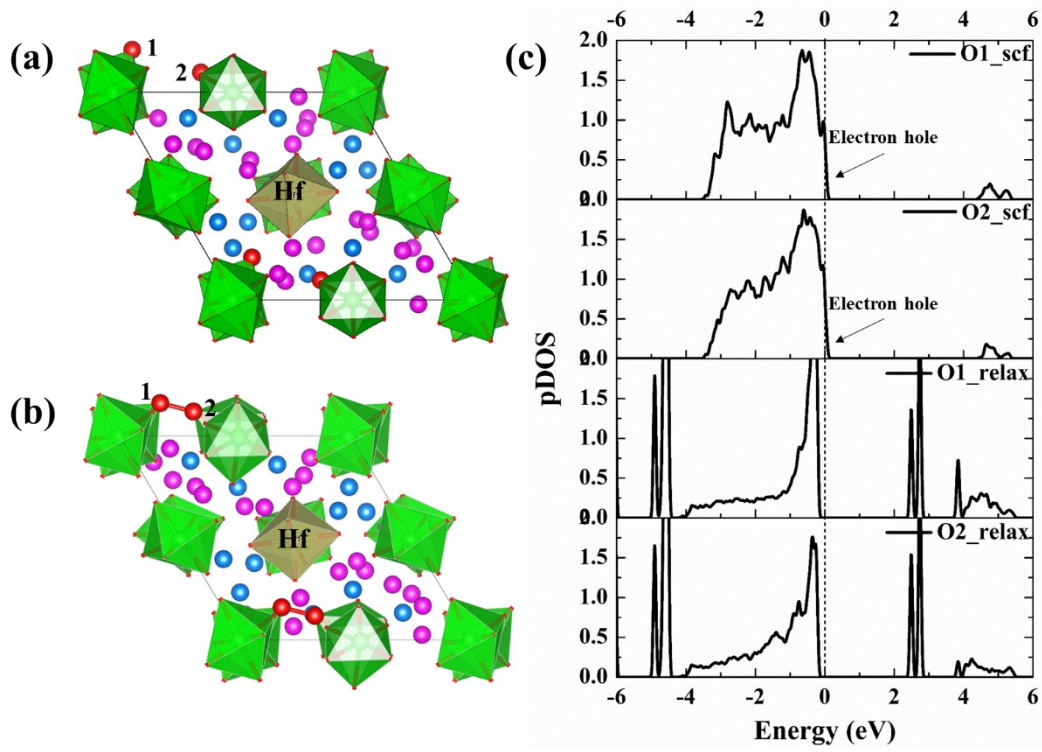

**Figure S12. Figure S11. (a)The crystal structure of LLZO\_Hf with four Li removed but the crystal lattice isn't relaxed. (b) The crystal structure of LLZO\_Hf with four Li removed and the crystal lattice is relaxed by Meta. (c) The local electronic structure of O1 and O2 before (scf) and after (relax) Meta\_dynamics.**

| <b>Table S1    Bader charge analysis of O1 and O2 for each NEB image</b> |              |              |              |              |
|--------------------------------------------------------------------------|--------------|--------------|--------------|--------------|
|                                                                          | <b>0</b>     | <b>1</b>     | <b>2</b>     | <b>3</b>     |
| O1                                                                       | <b>-1.11</b> | <b>-0.94</b> | <b>-0.64</b> | <b>-0.49</b> |
| O2                                                                       | <b>-1.31</b> | <b>-1.12</b> | <b>-0.76</b> | <b>-0.65</b> |

**Table S2** Relevant parameters for fitting function  $V=6.71-0.27q/r^3$ .

| Element | Valence | Crystal Radii (Å) | Voltage (V) |
|---------|---------|-------------------|-------------|
| Ru      | +5      | 0.71              | 2.85        |
| Ta      | +5      | 0.78              | 4.057       |
| Nb      | +5      | 0.82              | 4.34        |
| Sn      | +4      | 0.83              | 4.859       |
| Zr      | +4      | 0.86              | 4.94        |
| Hf      | +4      | 0.85              | 4.99        |
| Pb      | +4      | 0.92              | 5.286       |

**Table S3 Relevant parameters used for voltage prediction.**

| Element | Valence | Crystal Radii (Å) | Voltage (V) |
|---------|---------|-------------------|-------------|
| Ru      | +4      | 0.680             | 3.306       |
| Cr      | +4      | 0.690             | 3.452       |
| V       | +4      | 0.720             | 3.843       |
| Hf      | +4      | 0.720             | 3.843       |
| Nb      | +5      | 0.780             | 3.891       |
| Ta      | +5      | 0.780             | 3.891       |
| Rh      | +4      | 0.740             | 4.070       |
| Ti      | +4      | 0.745             | 4.122       |
| Pd      | +4      | 0.755             | 4.224       |
| Ir      | +4      | 0.765             | 4.320       |
| Re      | +4      | 0.770             | 4.367       |
| Tc      | +4      | 0.785             | 4.499       |
| Mo      | +4      | 0.790             | 4.540       |
| W       | +4      | 0.800             | 4.621       |
| Sn      | +4      | 0.830             | 4.840       |
| Bi      | +5      | 0.900             | 4.876       |
| Ga      | +3      | 0.760             | 4.883       |
| Pa      | +5      | 0.920             | 4.993       |
| Zr      | +4      | 0.860             | 5.029       |
| Tb      | +4      | 0.900             | 5.244       |
| Pb      | +4      | 0.915             | 5.315       |
| Sc      | +3      | 0.885             | 5.554       |
| Pr      | +4      | 0.990             | 5.609       |
| Sb      | +3      | 0.900             | 5.611       |
| In      | +3      | 0.940             | 5.746       |
| Th      | +4      | 1.080             | 5.863       |
| Lu      | +3      | 1.001             | 5.912       |
| Zn      | +2      | 0.880             | 5.927       |
| Yb      | +3      | 1.008             | 5.929       |
| Te      | +4      | 1.110             | 5.930       |
| Tm      | +3      | 1.020             | 5.956       |
| Er      | +3      | 1.030             | 5.978       |
| Y       | +3      | 1.040             | 5.999       |
| Ho      | +3      | 1.041             | 6.001       |
| Gd      | +3      | 1.078             | 6.072       |
| Eu      | +3      | 1.087             | 6.087       |
| Po      | +4      | 1.200             | 6.093       |
| Sm      | +3      | 1.098             | 6.106       |
| Dy      | +3      | 1.105             | 6.118       |
| Pm      | +3      | 1.110             | 6.126       |
| Nd      | +3      | 1.123             | 6.146       |
